# Supplementary material for: Exfoliated NbSe2 nanosheet@polypyrrole hybrid nanocomposites as a high performance anode of lithium-ion batteries
Source: Royal Society of Chemistry journal article supplement (doi:10.1039/d3ta01335a), 2023-01-01
Supplement: d3ta01335a1.pdf [file d3ta01335a1.pdf]

## Electronic Supplementary Information

### **Exfoliated NbSe<sub>2</sub> Nanosheet@Polypyrrole Hybrid Nanocomposites as a High Performance Anode of Lithium-Ion Batteries**

Byung-Ho Kang<sup>a,+</sup>, Seulgi Shin<sup>b,+</sup>, Kunwoo Nam<sup>a</sup>, Joonwon Bae<sup>c</sup>, Jong-Min Oh<sup>b</sup>, Sang-Mo Koo<sup>b</sup>, Hiesang Sohn<sup>d</sup>, Sung-Hoon Park<sup>\*a</sup>, and Weon Ho Shin<sup>\*b</sup>

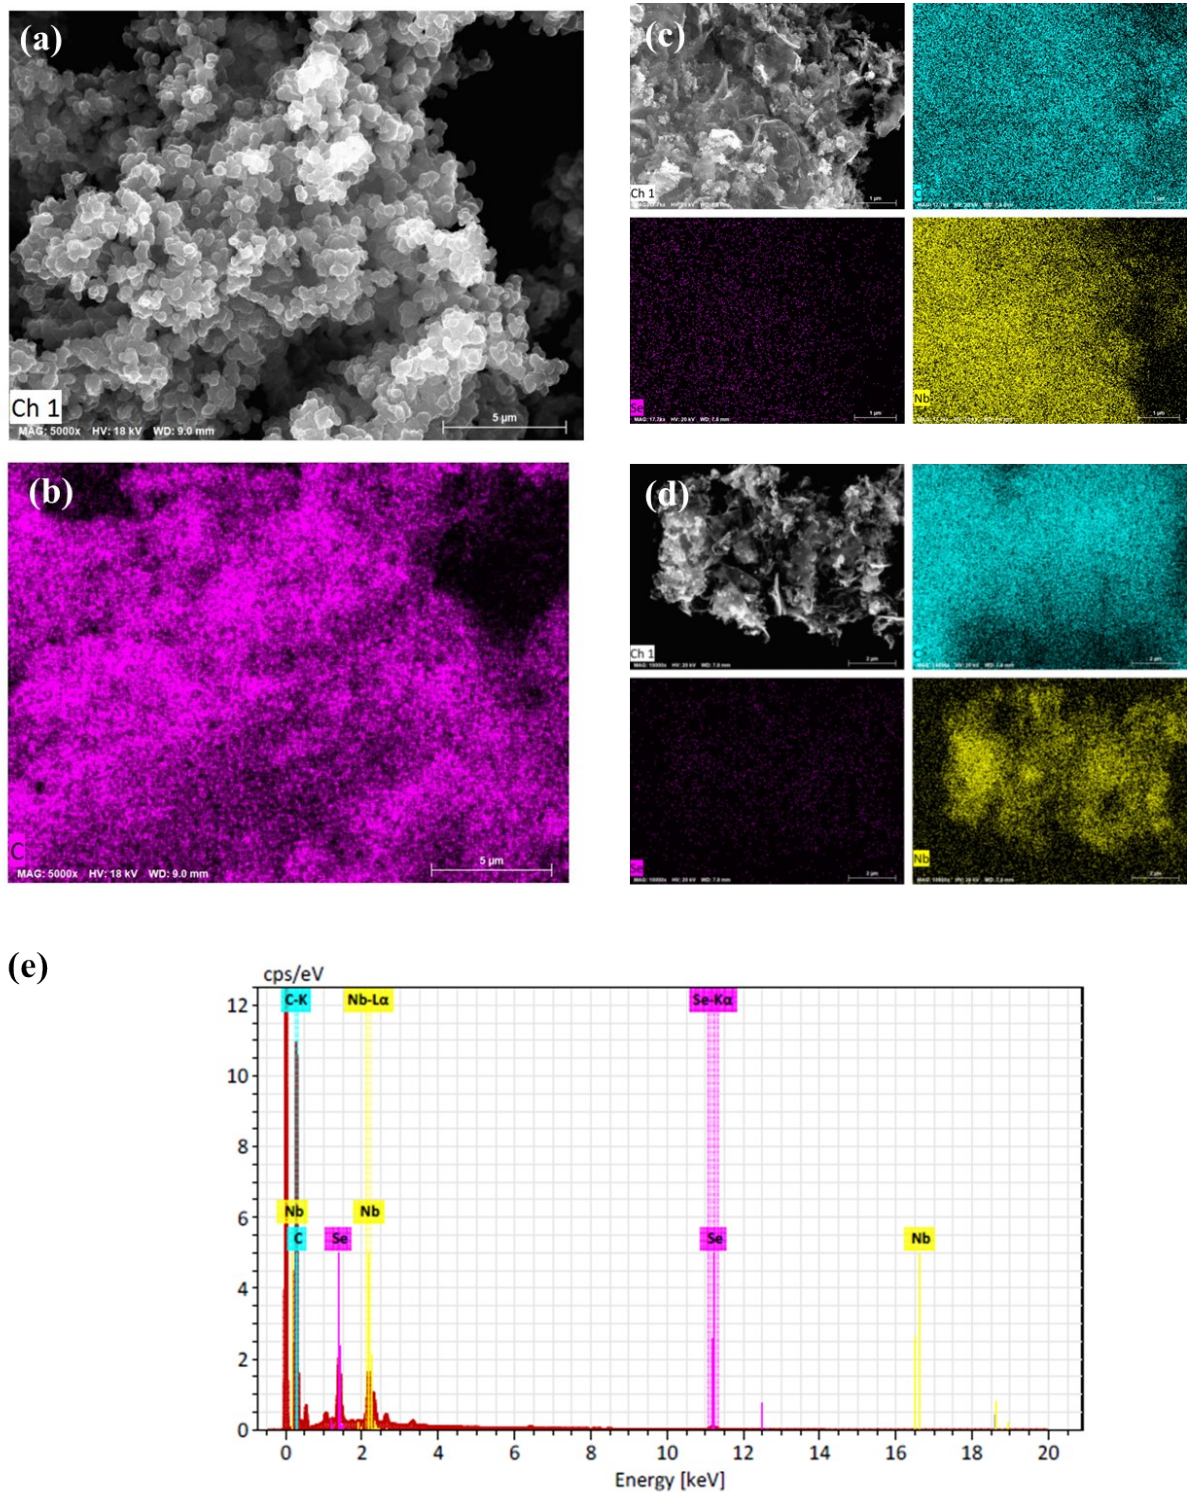

**Figure S1.** Morphology analysis of PPy and NbSe<sub>2</sub>@PPy nanocomposite. (a) and (b) SEM and EDS mapping images of PPy. (c) and (d) EDS mapping image of NbSe<sub>2</sub>@PPy-1 and NbSe<sub>2</sub>@PPy-2. (e) Energy dispersive spectrum of NbSe<sub>2</sub>@PPy-1 composite.

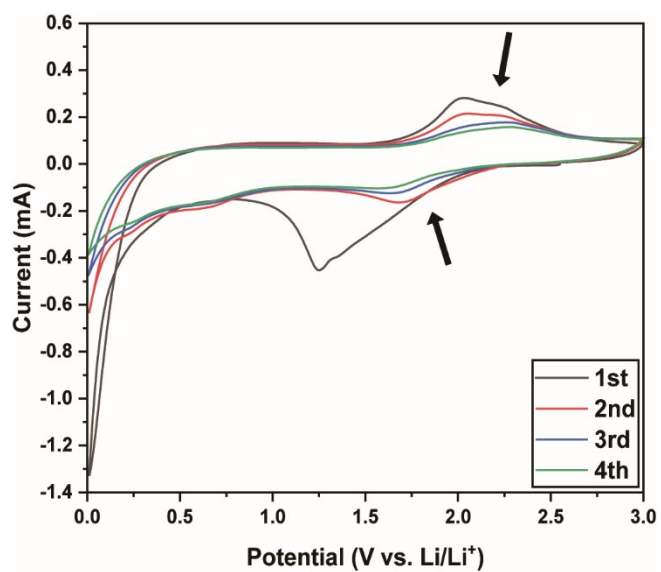

**Figure S2.** Cyclic voltammetry graphs of NbSe<sub>2</sub>@PPy-2 for first 4 cycles.

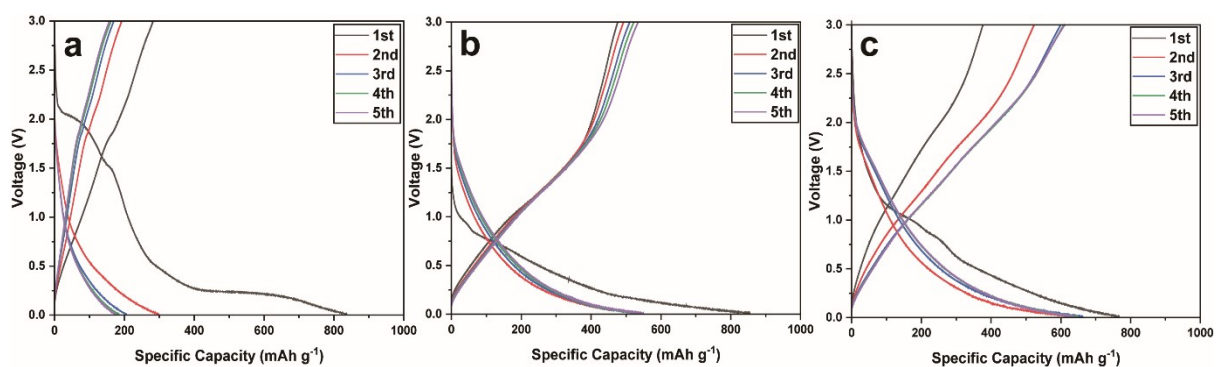

**Figure S3.** GCD graphs of first 5 cycles for (a) NbSe<sub>2</sub>, (b) PPy, (c) NbSe<sub>2</sub>@PPy-2.

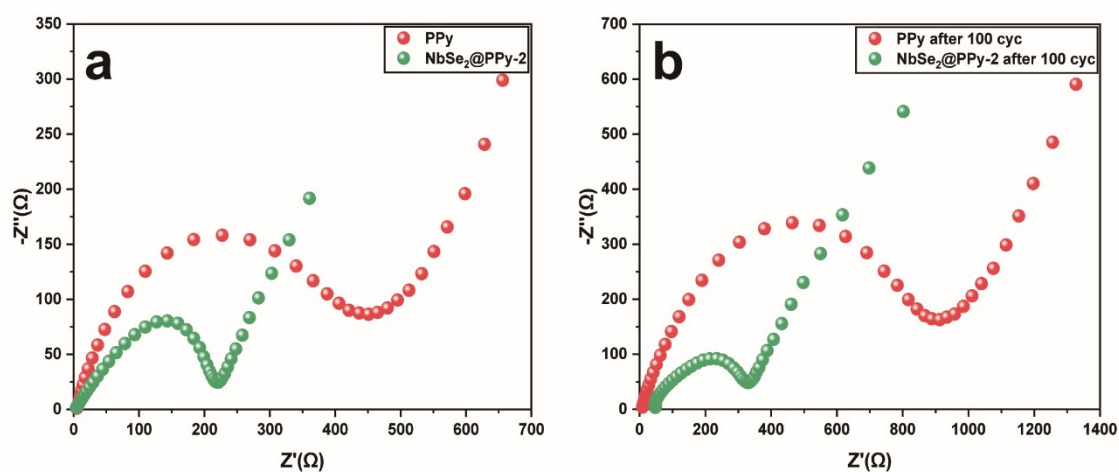

**Figure S4.** (a) Nyquist plots of PPy and NbSe<sub>2</sub>-PPy-2 before cycling, (e) Nyquist plots of PPy and NbSe<sub>2</sub>-PPy-2 after 100 cycles.

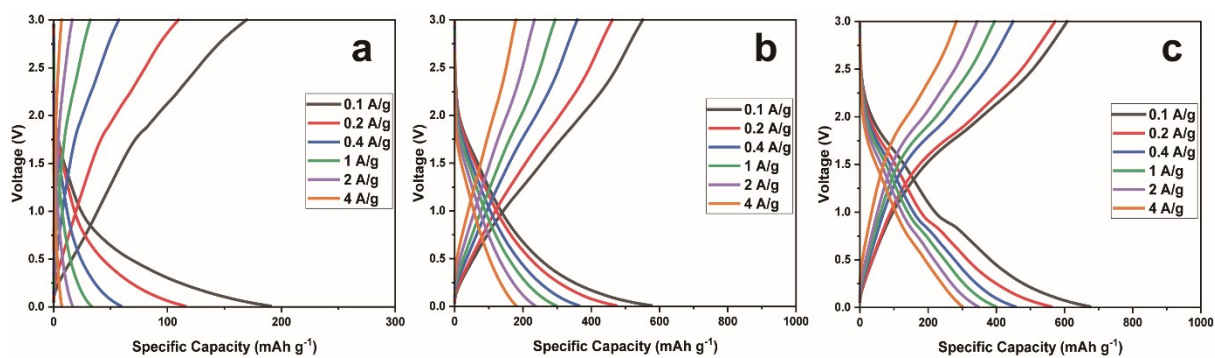

**Figure S5.** GDC graphs of (a) NbSe<sub>2</sub>, (b) PPy, and (c) NbSe<sub>2</sub>@PPy-2 by increasing the current density from 0.1 A/g to 4 A/g.
